# Supplementary material for: Microbes Bind Complement Inhibitor Factor H via a Common Site
Source: PubMed Central journal article supplement (PMC3630169; doi:10.1371/journal.ppat.1003308), 2013-04-18

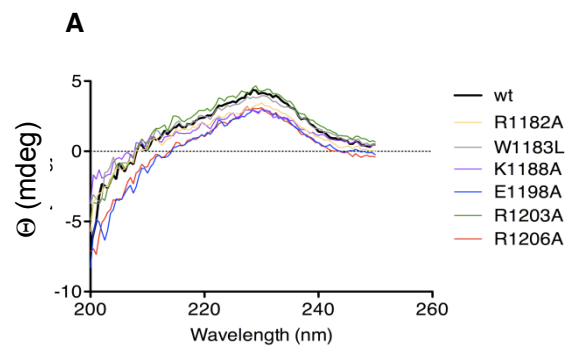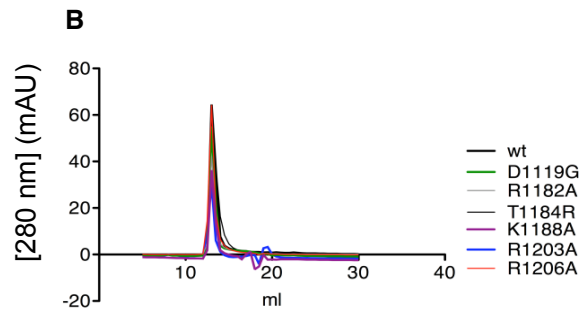

Supplement: ppat.1003308.s003.pdf [file ppat.1003308.s003.pdf]
