# Supplementary material for: Microbes Bind Complement Inhibitor Factor H via a Common Site
Source: PubMed Central journal article supplement (PMC3630169; doi:10.1371/journal.ppat.1003308), 2013-04-18
Supplement: ppat.1003308.s006.pdf [file ppat.1003308.s006.pdf]

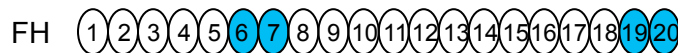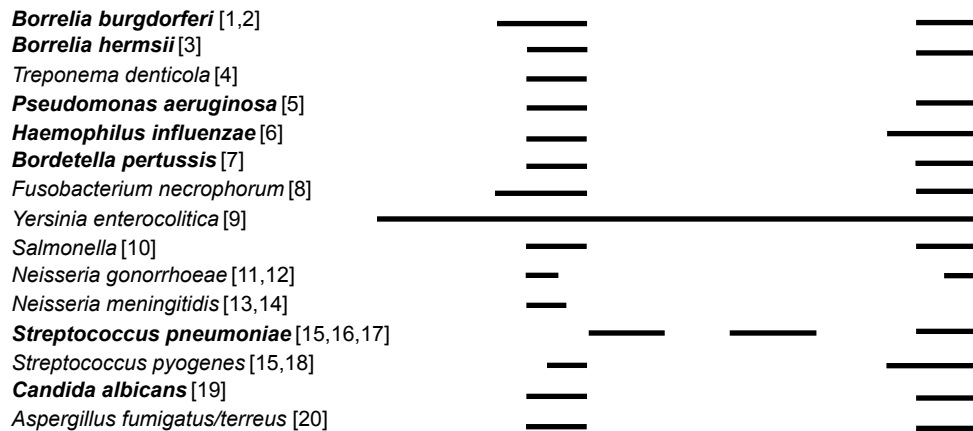

- Kraiczky P, Hellwage J, Skerka C, Kirschfink M, Brade V, et al. (2003) Immune evasion of *Borrelia burgdorferi*: mapping of a complement-inhibitor factor H-binding site of BbCRASP-3, a novel member of the Erp protein family. *Eur J Immunol* 33: 697-707.
- Alitalo A, Meri T, Chen T, Lankinen H, Cheng ZZ, et al. (2004) Lysine-dependent multipoint binding of the *Borrelia burgdorferi* virulence factor outer surface protein E to the C terminus of factor H. *J Immunol* 172: 6195-6201.
- Hovis KM, McDowell JV, Griffin L, Marconi RT (2004) Identification and characterization of a linear-plasmid-encoded factor H-binding protein (FhbA) of the relapsing fever spirochete *Borrelia hermsii*. *J Bacteriol* 186: 2612-2618.
- McDowell JV, Lankford J, Stamm L, Sadlon T, Gordon DL, et al. (2005) Demonstration of factor H-like protein 1 binding to *Treponema denticola*, a pathogen associated with periodontal disease in humans. *Infect Immun* 73: 7126-7132.
- Kunert A, Losse J, Gruszyn C, Huhn M, Kaendler K, et al. (2007) Immune evasion of the human pathogen *Pseudomonas aeruginosa*: elongation factor Tuf is a factor H and plasminogen binding protein. *J Immunol* 179: 2979-2988.
- Hallstrom T, Zipfel PF, Blom AM, Lauer N, Forsgren A, et al. (2008) *Haemophilus influenzae* interacts with the human complement inhibitor factor H. *J Immunol* 181: 537-545.
- Amdahl H, Jarva H, Haanperä M, Mertsola J, He Q, et al. (2011) Interactions between *Bordetella pertussis* and the complement inhibitor factor H. *Mol Immunol* 48: 697-705.
- Friberg N, Carlson P, Kentala E, Mattila PS, Kuusela P, et al. (2008) Factor H binding as a complement evasion mechanism for an anaerobic pathogen, *Fusobacterium necrophorum*. *J Immunol* 181: 8624-8632.
- Biedzka-Sarek M, Salmenlinna S, Gruber M, Lupas AN, Meri S, et al. (2008) Functional mapping of YadA- and Ail-mediated binding of human factor H to *Yersinia enterocolitica* serotype O:3. *Infect Immun* 76: 5016-5027.
- Ho DK, Jarva H, Meri S Human complement factor H binds to outer membrane protein Rck of *Salmonella*. *J Immunol* 185: 1763-1769.
- Ram S, McQuillen DP, Gulati S, Elkins C, Pangburn MK, et al. (1998) Binding of complement factor H to loop 5 of porin protein 1A: a molecular mechanism of serum resistance of nonsialylated *Neisseria gonorrhoeae*. *J Exp Med* 188: 671-680.
- Ngampasutadol J, Ram S, Gulati S, Agarwal S, Li C, et al. (2008) Human factor H interacts selectively with *Neisseria gonorrhoeae* and results in species-specific complement evasion. *J Immunol* 180: 3426-3435.
- Lewis LA, Ngampasutadol J, Wallace R, Reid JE, Vogel U, et al. (2010) The meningococcal vaccine candidate neisserial surface protein A (NspA) binds to factor H and enhances meningococcal resistance to complement. *PLoS Pathog* 6: e1001027.
- Schneider MC, Prosser BE, Caesar JJ, Kugelberg E, Li S, et al. (2009) *Neisseria meningitidis* recruits factor H using protein mimicry of host carbohydrates. *Nature* 458: 890-893.
- Blackmore TK, Fischetti VA, Sadlon TA, Ward HM, Gordon DL (1998) M protein of the group A *Streptococcus* binds to the seventh short consensus repeat of human complement factor H. *Infect Immun* 66: 1427-1431.
- Jarva H, Hellwage J, Jokiranta TS, Lehtinen MJ, Zipfel PF, et al. (2004) The group B streptococcal beta and pneumococcal Hic proteins are structurally related immune evasion molecules that bind the complement inhibitor factor H in an analogous fashion. *J Immunol* 172: 3111-3118.
- Hammerschmidt S, Agarwal V, Kunert A, Haelbich S, Skerka C, et al. (2007) The host immune regulator factor H interacts via two contact sites with the PspC protein of *Streptococcus pneumoniae* and mediates adhesion to host epithelial cells. *J Immunol* 178: 5848-5858.
- Reuter M, Caswell CC, Lukomski S, Zipfel PF (2010) Binding of the human complement regulators CFHR1 and factor H by streptococcal collagen-like protein 1 (Scl1) via their conserved C termini allows control of the complement cascade at multiple levels. *J Biol Chem* 285: 38473-38485.
- Meri T, Hartmann A, Lenk D, Eck R, Wurzner R, et al. (2002) The yeast *Candida albicans* binds complement regulators factor H and FHL- 1. *Infect Immun* 70: 5185-5192.
- Behnsen J, Hartmann A, Schmalzer J, Gehrke A, Brakhage AA, et al. (2008) The opportunistic human pathogenic fungus *Aspergillus fumigatus* evades the host complement system. *Infect Immun* 76: 820-827.
